# Supplementary material for: Synthesis of Ni–Mo and Co–Mo–Ni nano-sulfides and their stable catalysis on complicated full-ranged pyrolysis gasoline hydrorefinery
Source: Royal Society of Chemistry journal article supplement (doi:10.1039/c2ra20953e), 2012-01-01
Supplement: c2ra20953e.pdf [file c2ra20953e.pdf]

# Synthesis of Ni-Mo and Co-Mo-Ni Nano-Sulfides and their Stable Catalysis on Complicated Full-Ranged Pyrolysis Gasoline Hydrorefinery

## Supporting online information

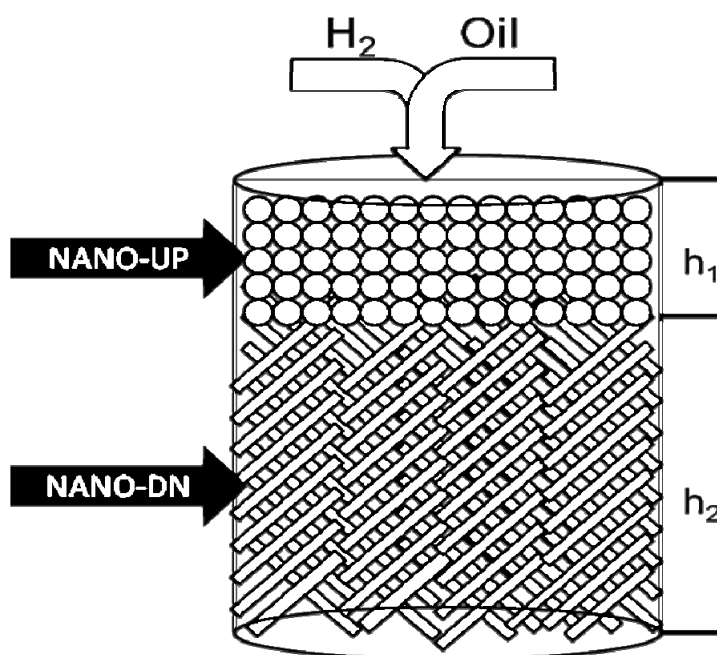

**Fig .S1** Schematic diagram of the process for PGHr.

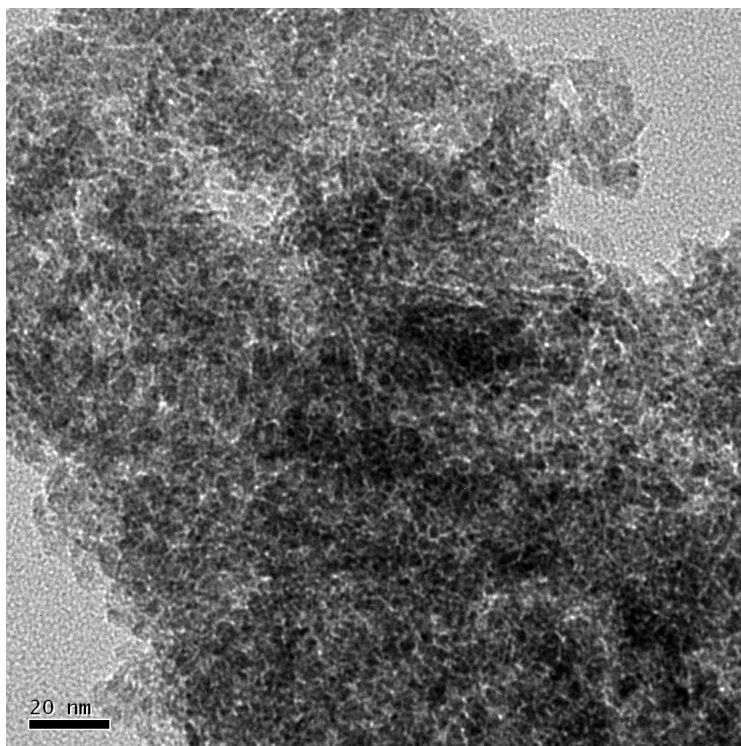

**Fig .S2** TEM image of the catalyst LY9802. The clusters of active components are obviously bigger than that of nanocatalysts and irregular morphology of substrates could not offer well penetrability.
